# Supplementary material
Source: Research Square preprint supplement (doi:10.21203/rs.3.rs-9456354/v1)
Supplement: Supplementary file 2 [file bd370476a52c1ab3568b7bcb.docx]

**Table S1**. Clinical characteristics of patients according to ALOX5 expression in RCC (n=531).

| **Characteristics** | **ALOX5 in RCC** | | **Sum(n=531)** | ***P value*** |
| --- | --- | --- | --- | --- |
|  | **High expression(n=283)** | **Low expression(n=248)** |  |  |
| Diagnosis age |  |  |  | 0.1098 |
| <60 | 123 | 125 | 248 |  |
| ≥60 | 160 | 123 | 283 |  |
| Gender |  |  |  | 0.7880 |
| Male | 184 | 164 | 348 |  |
| Female | 99 | 84 | 183 |  |
| Pathological grade |  |  |  | 0.7650 |
| G1-2 | 127 | 116 | 243 |  |
| G3-4 | 150 | 130 | 280 |  |
| NA | 6 | 2 | 8 |  |
| T stage |  |  |  | 0.2978 |
| I-II | 176 | 165 | 341 |  |
| III-IV | 107 | 83 | 190 |  |
| N stage |  |  |  | 0.8330 |
| ＋ | 8 | 8 | 16 |  |
| － | 126 | 113 | 239 |  |
| NA | 149 | 127 | 276 |  |
| M stage |  |  |  | 0.5123 |
| ＋ | 39 | 39 | 78 |  |
| － | 228 | 194 | 422 |  |
| NA | 16 | 15 | 31 |  |
| Overall survival |  |  |  | 0.0431 |
| Dead | 102 | 69 | 171 |  |
| Alive | 181 | 179 | 360 |  |

* ALOX5 was divided into high and low expression groups with an optimal cutoff value of 3.199.

ALOX5 low expression: Gene expression level of ALOX5<3.199;

ALOX5 high expression: Gene expression level of ALOX5≥3.199.
