# Supplementary material
Source: Research Square preprint supplement (doi:10.21203/rs.3.rs-9456354/v1)
Supplement: Supplementary file 3 [file c7dc32d6e0d345f0b1e24022.xlsx]

## Sheet: sheet1
Table S5: sh sequences, OE sequences
sh-NC	TTCTCCGAACGTGTCACGT
shRNA1962	GAAGAAGCAGCTGCCATATTA
shRNA355	TTGGCCCGAGATGACCAAATT
shRNA472	GCCAAATGCCACAAGGATTTA
OE-ALOX5	GCCACCATGCCCTCCTACACGGTCACCGTGGCCACTGGCAGCCAGTGGTTCGCCGGCACTGACGACTACATCTACCTCAGCCTCGTGGGCTCGGCGGGCTGCAGCGAGAAGCACCTGCTGGACAAGCCCTTCTACAACGACTTCGAGCGTGGCGCGGTGGATTCATACGACGTGACTGTGGACGAGGAACTGGGCGAGATCCAGCTGGTCAGAATCGAGAAGCGCAAGTACTGGCTGAATGACGACTGGTACCTGAAGTACATCACGCTGAAGACGCCCCACGGGGACTACATCGAGTTCCCCTGCTACCGCTGGATCACCGGCGATGTCGAGGTTGTCCTGAGGGATGGACGCGCAAAGTTGGCCCGAGATGACCAAATTCACATTCTCAAGCAACAC…
