# Supplementary material
Source: Research Square preprint supplement (doi:10.21203/rs.3.rs-9456354/v1)
Supplement: Supplementary file 3 [file d7bc1e12ad60c794a485bf8a.docx]

**Table S3.** Clinical characteristics of patients according to CPT1A expression in TMA (n=144)

| **Characteristics** | **CPT1A in TMA** | | **Sum(n=144)** | ***P value*** |
| --- | --- | --- | --- | --- |
|  | **High expression(n=74)** | **Low expression(n=70)** |  |  |
| Diagnosis age |  |  |  | 0.9138 |
| <60 | 30 | 29 | 59 |  |
| ≥60 | 44 | 41 | 85 |  |
| Gender |  |  |  | 0.0010 |
| Male | 44 | 59 | 103 |  |
| Female | 30 | 11 | 41 |  |
| WHO/ISUP grade |  |  |  | 0.0184 |
| G1-2 | 56 | 40 | 96 |  |
| G3-4 | 18 | 30 | 48 |  |
| TNM stage |  |  |  | 0.4232 |
| I-II | 62 | 55 | 117 |  |
| III-IV | 12 | 15 | 27 |  |
| Any metastases or recurrence |  |  |  | 0.0002 |
| Yes | 3 | 18 | 21 |  |
| No | 71 | 52 | 123 |  |
| Overall survival |  |  |  | 0.0144 |
| Dead | 4 | 13 | 17 |  |
| Alive | 70 | 57 | 127 |  |
