# Supplementary material
Source: Research Square preprint supplement (doi:10.21203/rs.3.rs-9456354/v1)
Supplement: Supplementary file 4 [file d3c7cb93fac387d4593bfc6d.xlsx]

## Sheet: Sheet1
Table S6: qRT-PCR primer
ALOX5-F	CCTATGCCTCCCTGTGCT
ALOX5-R	TGGTCGCCCTCGTAGTAGA
β-actin-F	GTACGCCAACACAGTGCTG
β-actin-R	CGTCATACTCCTGCTTGCTG
ACSL1-F	CCCATGAGCTGTTCCGGTAT
ACSL1-R	GGTGGTGAGTGCTGCAAAAG
CPT1A-F	GCAGCGTTCTTTGTGACGTT
CPT1A-R	AGGAGTGTTCAGCGTTGAGG
CPT2-F	CTGGAGCCAGAAGTGTTCCAC
CPT2-R	AGGCACAAAGCGTATGAGTCT
ACOX1-F	ACTCGCAGCCAGCGTTATG
ACOX1-R	AGGGTCAGCGATGCCAAAC
ECHS1-F	CTGCGTGTCCTGCTGTCCT
ECHS1-R	TTTTCTGCGATGATGTACTCAAA
EHHADH-F	CCTGGGCTGTCACTATAGGATT
EHHADH-R	AGAAGCTGGGTTCCTCTTGC
HADHA-F	GGTTTGGAGGTGGAAACCCA
HADHA-R	CAGGCGGAACTGGATGTCTT
ACAA2-F	CCATGGCAATGACTGCAGAG
ACAA2-R	GTAGCCAGCATCATTAGCAGC
HADHB-F	CTGTCCAGACCAAAACGAAGAA
HADHB-R	CGATGCAACAAACCCGTAAGC
PPARA-F	AAGCTGTCACCACAGTAGCTTG
PPARA-R	AACGAATCGCGTTGTGTGAC
PPARD-F	TGACAGTGTGGGGAAGTGTC
PPARD-R	GATCCTGCATGCTCAGTCAGT
PPARG-F	AGAAAACCAAGGGACCCGAA
PPARG-R	AGAGAGGGTCCCATTTCCGA
