# Supplementary material
Source: Research Square preprint supplement (doi:10.21203/rs.3.rs-9456354/v1)
Supplement: Supplementary file 4 [file e0576facb76b694fbc3fb36f.docx]

**Table S2.** Clinical characteristics of patients according to CPT1A expression in TMA30 (n=24)

| **Characteristics** | **CPT1A in TMA30** | | **Sum(n=24)** | ***P value*** |
| --- | --- | --- | --- | --- |
|  | **High expression(n=7)** | **Low expression(n=17)** |  |  |
| Diagnosis age |  |  |  | 0.4755 |
| <60 | 3 | 10 | 13 |  |
| ≥60 | 4 | 7 | 11 |  |
| Gender |  |  |  | 0.1123 |
| Male | 3 | 13 | 16 |  |
| Female | 4 | 4 | 8 |  |
| WHO/ISUP grade |  |  |  | 0.3034 |
| G1-2 | 6 | 11 | 17 |  |
| G3-4 | 1 | 6 | 7 |  |
| TNM stage |  |  |  | 0.3432 |
| I-II | 7 | 15 | 22 |  |
| III-IV | 0 | 2 | 2 |  |
| Any metastases or recurrence |  |  |  | 0.1068 |
| Yes | 0 | 5 | 5 |  |
| No | 7 | 12 | 19 |  |
| Overall survival |  |  |  | 0.9672 |
| Dead | 2 | 5 | 7 |  |
| Alive | 5 | 12 | 17 |  |
