# Supplementary material
Source: Research Square preprint supplement (doi:10.21203/rs.3.rs-9456354/v1)
Supplement: Supplementary file 7 [file fd221aff8c155df2d58507a4.xlsx]

## Sheet: 1
Table S4: 1400 lipid metabolic process genes from MSigDB.
GOBP_LIPID_METABOLIC_PROCESS
A3GALT2
A4GALT
AACS
AADAC
AASDH
ABCA1
ABCA12
ABCA2
ABCA3
ABCA4
ABCA5
ABCA7
ABCA8
ABCB11
ABCB4
ABCC1
ABCC9
ABCD1
ABCD2
ABCD3
ABCD4
ABCG1
ABCG2
ABCG4
ABHD1
ABHD11
ABHD12
ABHD12B
ABHD15
ABHD16A
ABHD16B
ABHD2
ABHD3
ABHD4
ABHD5
ABHD6
ABHD8
ABO
ACAA1
ACAA2
ACACA
ACACB
ACAD10
ACAD11
ACAD8
ACAD9
ACADL
ACADM
ACADS
ACADSB
ACADVL
ACAT1
ACAT2
ACBD3
ACBD4
ACBD5
ACBD7
ACER1
ACER2
ACER3
ACLY
ACOT1
ACOT11
ACOT12
ACOT13
ACOT2
ACOT4
ACOT6
ACOT7
ACOT8
ACOT9
ACOX1
ACOX2
ACOX3
ACOXL
ACP3
ACP6
ACSBG1
ACSBG2
ACSF2
ACSF3
ACSL1
ACSL3
ACSL4
ACSL5
ACSL6
ACSM1
ACSM2A
ACSM2B
ACSM3
ACSM4
ACSM5
ACSM6
ACSS1
ACSS2
ACSS3
ADGRF1
ADGRF5
ADH1A
ADH1B
ADH1C
ADH4
ADH5
ADH6
ADH7
ADHFE1
ADIPOQ
ADIPOR1
ADIPOR2
ADM
ADORA1
ADRA2A
ADTRP
AFP
AGK
AGMO
AGPAT1
AGPAT2
AGPAT3
AGPAT4
AGPAT5
AGPS
AGT
AGTR1
AIG1
AJUBA
AKR1A1
AKR1B1
AKR1B10
AKR1B15
AKR1C1
AKR1C2
AKR1C3
AKR1C4
AKR1D1
AKR7A2
AKT1
AKT2
ALDH1A1
ALDH1A2
ALDH1A3
ALDH1L2
ALDH3A1
ALDH3A2
ALDH3B1
ALDH3B2
ALDH8A1
ALK
ALKBH7
ALOX12
ALOX12B
ALOX15
ALOX15B
ALOX5
ALOXE3
AMACR
ANGPTL3
ANGPTL4
ANGPTL8
ANKRD23
ANO9
AOAH
AOX1
APOA1
APOA2
APOA4
APOA5
APOB
APOBEC1
APOBR
APOC1
APOC2
APOC3
APOC4
APOD
APOE
APOF
APOH
APOL1
APOL2
APOL4
APOL5
APPL2
AQP8
ARMC5
ARSA
ARV1
ASAH1
ASAH2
ASAH2B
ASMT
ASPG
ASXL3
ATF2
ATG14
ATG4A
ATM
ATP1A1
ATP5F1A
ATP5F1B
ATP6V1B1
ATP8B1
AUH
AVIL
AVP
AVPR1A
AWAT1
AWAT2
B3GALNT1
B3GALT1
B3GALT2
B3GALT4
B3GALT5
B3GNT5
B4GALNT1
B4GALNT2
B4GALT1
B4GALT3
B4GALT4
B4GALT5
B4GALT6
BAAT
BAX
BBS1
BBS4
BCAT1
BCAT2
BCKDHB
BCKDK
BCL11B
BCO1
BCO2
BDH1
BDH2
BECN1
BGLAP
BLOC1S6
BMP2
BMP5
BMP6
BMX
BPNT1
BPNT2
BRCA1
BSCL2
BTN2A1
C1QTNF2
C20orf173
C3
C7orf50
CACNA1H
CAPN2
CAT
CAV1
CAV3
CBR1
CBR4
CCDC3
CCN1
CD2AP
CD36
CD74
CDIPT
CDS1
CDS2
CEACAM1
CEBPA
CEL
CEPT1
CERK
CERKL
CERS1
CERS2
CERS3
CERS4
CERS5
CERS6
CERT1
CES1
CES2
CETP
CFTR
CGA
CH25H
CHAT
CHKA
CHKB
CHP1
CHPT1
CHRM5
CHST10
CIDEA
CIDEB
CIDEC
CLCN2
CLN3
CLN6
CLN8
CLPS
CLPSL1
CLPSL2
CLSTN3
CLU
CNEP1R1
COMT
COQ2
COX10
CPNE1
CPNE7
CPS1
CPT1A
CPT1B
CPT1C
CPT2
CRABP2
CRAT
CREB1
CREBL2
CREM
CRH
CRK
CRKL
CRLS1
CROT
CRPPA
CRTC3
CRYL1
CSNK1G2
CTDNEP1
CTH
CTHRC1
CUBN
CWH43
CYB5R1
CYB5R2
CYB5R3
CYGB
CYP11A1
CYP11B1
CYP11B2
CYP17A1
CYP19A1
CYP1A1
CYP1A2
CYP1B1
CYP21A2
CYP24A1
CYP26A1
CYP26B1
CYP26C1
CYP27A1
CYP27B1
CYP27C1
CYP2A13
CYP2A6
CYP2A7
CYP2B6
CYP2C18
CYP2C19
CYP2C8
CYP2C9
CYP2D6
CYP2E1
CYP2F1
CYP2J2
CYP2R1
CYP2S1
CYP2U1
CYP2W1
CYP39A1
CYP3A4
CYP3A43
CYP3A5
CYP3A7
CYP46A1
CYP4A11
CYP4A22
CYP4B1
CYP4F11
CYP4F12
CYP4F2
CYP4F22
CYP4F3
CYP4F8
CYP4V2
CYP4X1
CYP4Z1
CYP51A1
CYP7A1
CYP7B1
CYP8B1
DAB2
DAGLA
DAGLB
DBI
DCAF5
DDHD1
DDHD2
DDX20
DECR1
DECR2
DEGS1
DEGS2
DGAT1
DGAT2
DGAT2L6
DGKA
DGKB
DGKD
DGKE
DGKG
DGKH
DGKI
DGKK
DGKQ
DGKZ
DHCR24
DHCR7
DHDDS
DHH
DHRS11
DHRS2
DHRS3
DHRS4
DHRS4L1
DHRS4L2
DHRS7
DHRS7B
DHRS9
DHRSX
DISP3
DKK3
DKKL1
DNAJC15
DNAJC19
DOLK
DOLPP1
DPEP1
DPEP2
DPM1
DPM2
DPM3
EBP
EBPL
ECH1
ECHDC1
ECHDC2
ECHDC3
ECHS1
ECI1
ECI2
EDF1
EDN1
EDN2
EDNRB
EEF1A2
EFR3A
EFR3B
EGR1
EHHADH
EIF6
ELOVL1
ELOVL2
ELOVL3
ELOVL4
ELOVL5
ELOVL6
ELOVL7
ENDOU
ENPP2
ENPP6
ENPP7
ENSG00000293349
EPHX1
EPHX2
EPHX3
ERFE
ERG28
ERLIN1
ERLIN2
ERRFI1
ESR1
ETFA
ETFB
ETFBKMT
ETFDH
ETNK1
ETNK2
ETNPPL
FA2H
FAAH
FAAH2
FABP2
FABP3
FABP5
FABP6
FADS1
FADS2
FADS2B
FADS3
FADS6
FAH
FAM135A
FAM135B
FAR1
FAR2
FASN
FAXDC2
FBXW7
FDFT1
FDPS
FDX1
FDXR
FECH
FGF1
FGF19
FGF23
FGFR1
FGFR4
FIG4
FITM1
FITM2
FKRP
FLVCR1
FMC1
FMO1
FMO2
FMO4
FMO5
FNTB
FSHB
FUCA1
FUT1
FUT2
FUT3
FUT4
FUT5
FUT6
FUT7
FUT9
G6PC1
G6PD
GAL
GAL3ST1
GAL3ST2
GAL3ST3
GAL3ST4
GALC
GALR2
GATA6
GBA1
GBA2
GBA3
GBGT1
GC
GCDH
GDE1
GDF15
GDPD1
GDPD2
GDPD3
GDPD4
GDPD5
GFI1
GGCX
GGPS1
GGT1
GGT2P
GGT3P
GGT5
GGT6
GGT7
GGTA1
GGTLC1
GGTLC2
GGTLC3
GHSR
GIP
GK
GK2
GK5
GLA
GLB1
GLT6D1
GLYATL2
GLYATL3
GM2A
GNAI1
GNB3
GNPAT
GOLM1
GPAA1
GPAM
GPAT2
GPAT3
GPAT4
GPCPD1
GPER1
GPIHBP1
GPLD1
GPR146
GPR180
GPR31
GPR82
GPRC6A
GPS2
GPX1
GPX4
GPX5
GSTA1
GSTA3
GSTM1
GSTM2
GSTM4
GSTP1
H6PD
HACD1
HACD2
HACD3
HACD4
HACL1
HADH
HADHA
HADHB
HAO1
HAO2
HCAR1
HCAR2
HDHD5
HDLBP
HEXA
HEXB
HINT2
HMGCL
HMGCLL1
HMGCR
HMGCS1
HMGCS2
HNF4A
HPGD
HPGDS
HPS6
HSD11B1
HSD11B2
HSD17B1
HSD17B10
HSD17B11
HSD17B12
HSD17B13
HSD17B14
HSD17B2
HSD17B3
HSD17B4
HSD17B6
HSD17B7
HSD17B8
HSD3B1
HSD3B2
HSD3B7
HSPG2
HTD2
HTR2A
HTR2B
HTR2C
HTRA2
HYCC1
HYCC2
IAH1
ID2
IDH1
IDI1
IDI2
IFNG
IGFBP7
IL1B
IL1RN
IL4
ILVBL
IMPA1
IMPA2
INHBA
INPP1
INPP4A
INPP4B
INPP5A
INPP5B
INPP5D
INPP5E
INPP5F
INPP5J
INPP5K
INPPL1
INS
INSIG1
INSIG2
IP6K1
IP6K2
IP6K3
IPMK
IRS1
IRS2
ISYNA1
ITGB8
ITPKA
ITPKB
ITPKC
IVD
JAZF1
KAT2B
KAT5
KBTBD2
KDSR
KIT
KLHL25
KPNB1
LACTB
LARGE1
LBR
LCAT
LCLAT1
LCT
LDAH
LDLR
LDLRAP1
LEP
LEPR
LGALS13
LGMN
LHB
LHCGR
LIAS
LIMA1
LIPA
LIPC
LIPE
LIPF
LIPG
LIPH
LIPI
LIPJ
LIPK
LIPM
LIPN
LIPT1
LMF1
LONP2
LPA
LPCAT1
LPCAT2
LPCAT3
LPCAT4
LPGAT1
LPIN1
LPIN2
LPIN3
LPL
LRAT
LRCOL1
LRP1
LRP10
LRP2
LRP5
LRP8
LSS
LTA4H
LTC4S
LYPLA1
LYPLA2
M6PR
MACROH2A1
MALRD1
MAPK1
MAPK14
MBLAC2
MBOAT1
MBOAT2
MBOAT4
MBOAT7
MBTPS1
MBTPS2
MCAT
MCEE
MECP2
MECR
MED1
MFSD2A
MFSD2B
MFSD8
MGLL
MGST2
MGST3
MID1IP1
MIF
MIR1-1
MIR127
MIR132
MIR16-1
MIR182
MIR185
MIR192
MIR195
MIR204
MIR206
MIR27A
MIR27B
MIR29B1
MIR30C1
MIR33A
MIR342
MIR548P
MIR766
MIR9-1
MIR96
MIR98
MLST8
MLXIPL
MLYCD
MMUT
MOGAT1
MOGAT2
MOGAT3
MORC2
MPPE1
MSMO1
MTLN
MTM1
MTMR1
MTMR10
MTMR11
MTMR12
MTMR14
MTMR2
MTMR3
MTMR4
MTMR6
MTMR7
MTMR8
MTMR9
MTOR
MTTP
MVD
MVK
NAA40
NAAA
NAGA
NAGLU
NAPEPLD
NCEH1
NCOA2
NCOR1
NDUFAB1
NDUFS6
NEU1
NEU2
NEU3
NEU4
NFE2L1
NFKB1
NKX2-1
NKX2-3
NPC1
NPC1L1
NPC2
NPHP3
NR0B1
NR0B2
NR1D1
NR1D2
NR1H2
NR1H3
NR1H4
NR1I2
NR3C1
NR5A1
NR5A2
NSDHL
NSMAF
NUDT19
NUDT7
NUDT8
NUS1
OC90
OCRL
OGT
OLAH
OMA1
OPA3
ORMDL1
ORMDL2
ORMDL3
OSBP
OSBPL10
OSBPL1A
OSBPL2
OSBPL3
OSBPL5
OSBPL6
OSBPL7
OSBPL8
OSBPL9
OXCT1
OXCT2
OXSM
P2RX1
P2RX7
PAFAH1B1
PAFAH1B2
PAFAH1B3
PAFAH2
PAM
PANK2
PAQR3
PAQR4
PBX1
PC
PCCA
PCCB
PCK1
PCK2
PCSK9
PCYT1A
PCYT1B
PCYT2
PDE3A
PDE3B
PDE8B
PDGFA
PDGFB
PDGFRA
PDK1
PDK2
PDK3
PDK4
PDSS1
PDSS2
PECR
PEDS1
PEMT
PER2
PEX13
PEX2
PEX5
PEX7
PGAP1
PGAP2
PGAP3
PGAP4
PGAP6
PGK1
PGP
PGS1
PHB2
PHYH
PI4K2A
PI4K2B
PI4KA
PI4KAP2
PI4KB
PIAS4
PIBF1
PIGA
PIGB
PIGC
PIGF
PIGG
PIGH
PIGK
PIGL
PIGM
PIGN
PIGO
PIGP
PIGQ
PIGS
PIGT
PIGU
PIGV
PIGW
PIGX
PIGY
PIGZ
PIK3C2A
PIK3C2B
PIK3C2G
PIK3C3
PIK3CA
PIK3CB
PIK3CD
PIK3CG
PIK3R1
PIK3R3
PIK3R4
PIK3R5
PIKFYVE
PIP4K2A
PIP4K2B
PIP4K2C
PIP4P1
PIP4P2
PIP5K1A
PIP5K1B
PIP5K1C
PIP5KL1
PIPSL
PISD
PITPNA
PITPNB
PITPNM1
PITPNM2
PITPNM3
PLA1A
PLA2G10
PLA2G12A
PLA2G12B
PLA2G15
PLA2G1B
PLA2G2A
PLA2G2C
PLA2G2D
PLA2G2E
PLA2G2F
PLA2G3
PLA2G4A
PLA2G4B
PLA2G4C
PLA2G4D
PLA2G4E
PLA2G4F
PLA2G5
PLA2G6
PLA2G7
PLAA
PLAAT1
PLAAT2
PLAAT3
PLAAT4
PLAAT5
PLAGL2
PLB1
PLBD1
PLBD2
PLCB1
PLCB2
PLCB3
PLCB4
PLCD1
PLCD3
PLCD4
PLCE1
PLCG1
PLCG2
PLCH1
PLCH2
PLCL1
PLCL2
PLCXD1
PLCXD2
PLCXD3
PLCZ1
PLD1
PLD2
PLD3
PLD4
PLD6
PLEKHA1
PLIN1
PLIN5
PLP1
PLPP1
PLPP2
PLPP3
PLPP4
PLPP5
PLPP6
PLPPR1
PLPPR2
PLPPR3
PLPPR4
PLPPR5
PLSCR1
PLTP
PM20D1
PMVK
PNLIP
PNLIPRP1
PNLIPRP2
PNLIPRP3
PNPLA1
PNPLA2
PNPLA3
PNPLA4
PNPLA5
PNPLA6
PNPLA7
PNPLA8
PON1
POR
PORCN
PPARA
PPARD
PPARG
PPARGC1A
PPM1L
PPT1
PPT2
PRDX6
PRKAA1
PRKAA2
PRKAB1
PRKAB2
PRKACA
PRKAG1
PRKAG2
PRKAG3
PRKAR2B
PRKCD
PRKCE
PRKD1
PRKD2
PRKD3
PRKG1
PRLH
PRLR
PRMT3
PROCA1
PROX1
PRPF19
PRXL2B
PSAP
PSAPL1
PTDSS1
PTDSS2
PTEN
PTGDS
PTGES
PTGES2
PTGES3
PTGIS
PTGR1
PTGR2
PTGR3
PTGS1
PTGS2
PTPMT1
PTPN11
PTPN22
PTPRN2
PTPRQ
PXMP4
QKI
RAB38
RAB7A
RARRES2
RBP1
RBP2
RBP3
RBP4
RDH10
RDH11
RDH12
RDH13
RDH14
RDH16
RDH5
RDH8
REST
RETSAT
RICTOR
RIDA
RLBP1
RNF213
RORA
RORC
RPE65
RPTOR
RUBCNL
SACM1L
SAMD1
SAMD8
SC5D
SCAP
SCARB1
SCARB2
SCARF1
SCCPDH
SCD
SCD5
SCNN1B
SCP2
SCPEP1
SCT
SDR16C5
SDR42E1
SDR42E2
SDR9C7
SDS
SDSL
SEC14L2
SEL1L
SELENOI
SERAC1
SERINC1
SERINC2
SERINC4
SERINC5
SERPINA12
SERPINA3
SERPINA6
SESN2
SFTPB
SGMS1
SGMS2
SGPL1
SGPP1
SGPP2
SH3GLB1
SH3YL1
SHH
SIK1
SIRT1
SIRT2
SIRT3
SIRT4
SIRT6
SLC16A1
SLC16A11
SLC22A13
SLC22A24
SLC22A4
SLC25A17
SLC27A1
SLC27A2
SLC27A3
SLC27A4
SLC27A5
SLC27A6
SLC30A5
SLC35C1
SLC44A1
SLC44A2
SLC44A3
SLC44A4
SLC44A5
SLC45A3
SMG1
SMPD1
SMPD2
SMPD3
SMPD4
SMPDL3A
SMPDL3B
SNAI1
SNAI2
SNCA
SNX17
SOAT1
SOAT2
SORBS1
SORL1
SOX9
SPART
SPATA18
SPHK1
SPHK2
SPNS2
SPP1
SPTLC1
SPTLC2
SPTLC3
SPTSSA
SPTSSB
SQLE
SRD5A1
SRD5A2
SRD5A3
SREBF1
SREBF2
ST3GAL1
ST3GAL2
ST3GAL3
ST3GAL4
ST3GAL5
ST3GAL6
ST6GALNAC3
ST6GALNAC4
ST6GALNAC5
ST6GALNAC6
ST8SIA1
ST8SIA2
ST8SIA3
ST8SIA4
ST8SIA5
ST8SIA6
STAR
STARD3
STARD4
STAT5A
STAT5B
STS
STUB1
SULT1A1
SULT1A2
SULT1A3
SULT1A4
SULT1C3
SULT1E1
SULT2A1
SULT2B1
SULT4A1
SUMF1
SYNJ1
SYNJ2
TAFAZZIN
TAMM41
TBL1XR1
TBXAS1
TECR
TECRL
TEX2
THEM4
THEM5
THNSL2
THRA
THRSP
TIPARP
TLCD3B
TM6SF2
TM7SF2
TM9SF2
TMEM135
TMEM150A
TMEM38B
TMEM43
TMEM68
TMEM86A
TMEM86B
TMX1
TNF
TNFAIP8L3
TNFRSF1A
TNXB
TPK1
TPP1
TPRA1
TPTE2
TREM2
TREX1
TRIB3
TRPV1
TSKU
TSPO
TTC39B
TTC7A
TTC7B
TTPA
TTR
TWIST1
TYRP1
TYSND1
UBR4
UCP3
UGCG
UGT1A1
UGT1A10
UGT1A3
UGT1A4
UGT1A6
UGT1A7
UGT1A8
UGT1A9
UGT2A1
UGT2A2
UGT2B10
UGT2B11
UGT2B15
UGT2B17
UGT2B28
UGT2B4
UGT2B7
UGT8
UMOD
UVRAG
VAC14
VAPA
VLDLR
VPS54
VSIG2
WDTC1
WNT10B
WNT4
XBP1
YWHAH
ZBTB20
ZFP69
ZFP92
ZMPSTE24
ZNF202
ZNF670
ZNF750
ZPBP2
